# Supplementary material for: Promoter-sharing by different genes in human genome – CPNE1 and RBM12 gene pair as an example
Source: PubMed Central journal article supplement (PMC2568002; doi:10.1186/1471-2164-9-456), 2008-10-03

# Supplementary Figure 1. Mapviewer display of CPNE1 and RBM12 in human and mouse genome

## A. Human

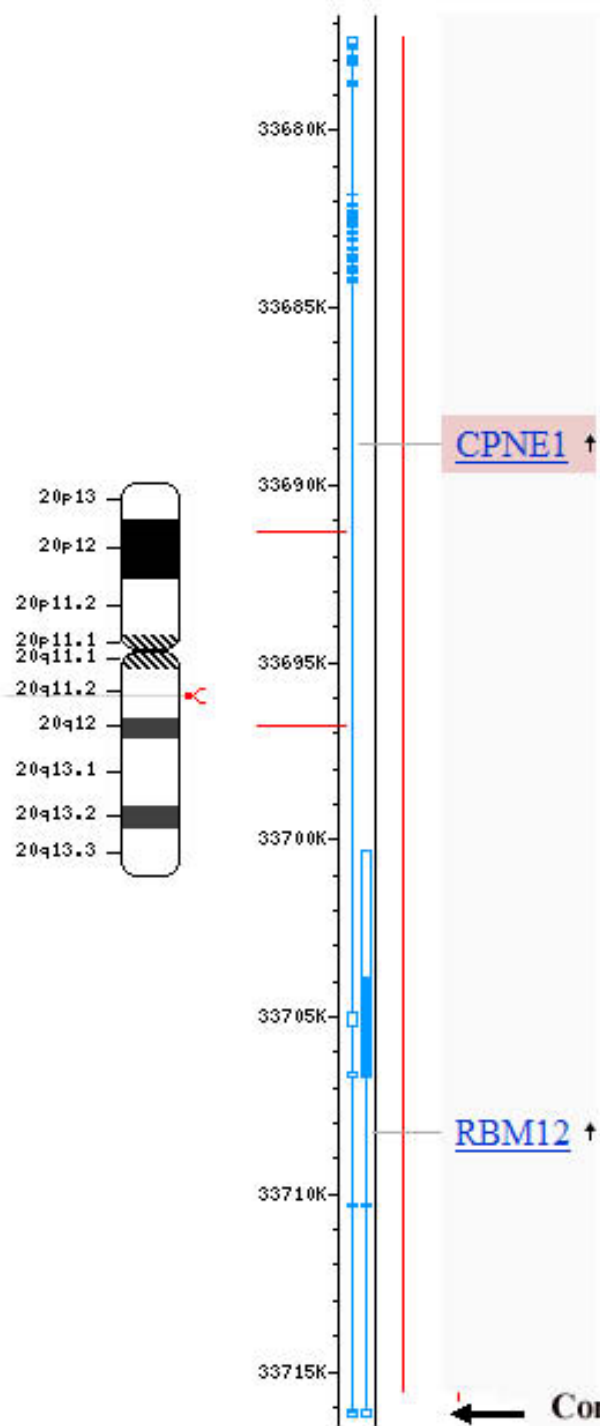

## B. Mouse

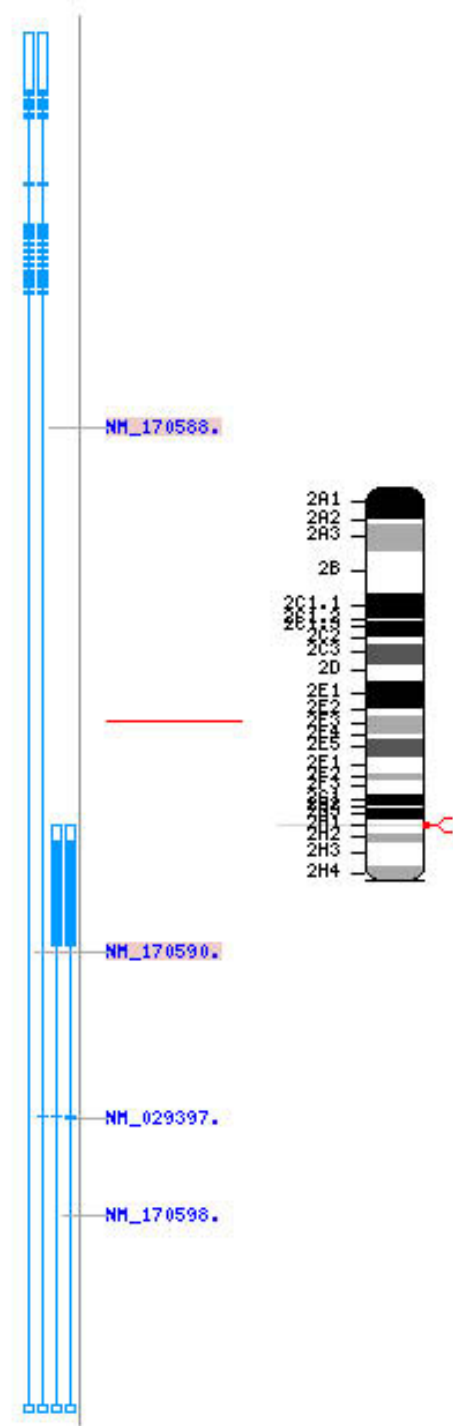

## Supplementary Figure 2.

### Zebrafish RBM12 EST sequences aligning with Zebrafish CPNE1 cDNA, NM\_199699 --Evidence of sharing most 5' exon and therefore promoter between the two genes in zebrafish

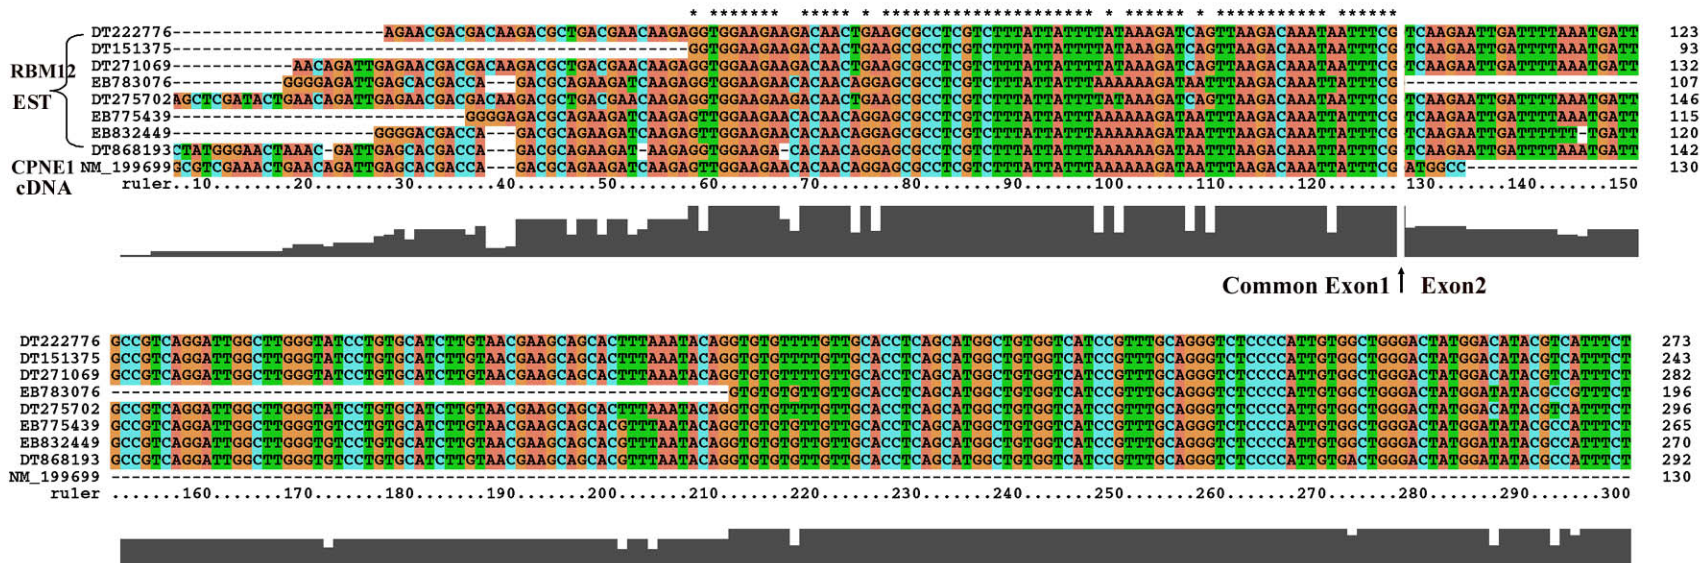







**Supple. Fig4: Stem-loop formation of mammal 5'UTR sequences for the two genes.**

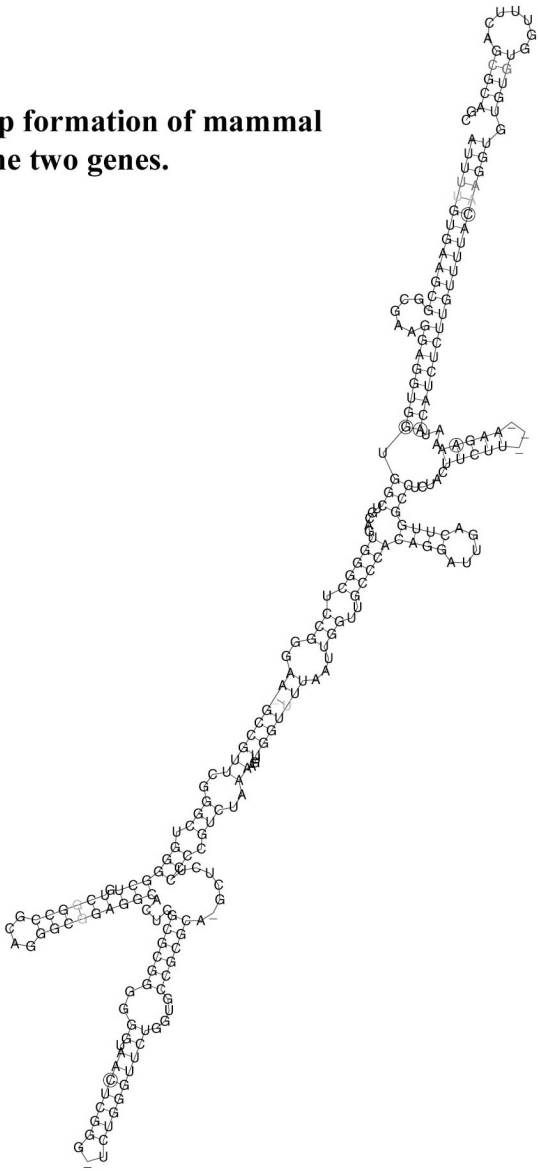

**5'UTR sequences from several mammals were aligned using ClustalX and a consensus secondary RNA structure formation was predicted using Alifold program. The sequences used include sequences from exon 1, exon2 and non-coding part of exon3, which represent the longest 5'UTR sequences in RBM12 gene.**

Supplementary Figure 5.

Sequence alignment for the region upstream of CPNE1/RBM12 gene pair cDNA (1000 bp) from human, mouse, rat and chicken using MAVID program (<http://baboon.math.berkeley.edu/mavid/>)

[Bray N](#) and [Pachter L](#), [MAVID: Constrained ancestral alignment of multiple sequences](#), *Genome Research*, 14:693-699 (2004).





Mouse TGGTTTTTCGAGACAGGGTTTTCTCTGTATAGTCTGGCTGTCTG-----G  
Human TAG----AAGAGACGGGGTTTTCACGGTGTAGCCAGGATGGTCTC-----G  
Rat AATGTCTCTGTGTAGAGTTTTGTGCACATGAGTGAAGATGTCTTCAGAGGCCAGAGGAGG  
chicken -----GCTGGCACAGTCTGTTTCATGGAGGCACAGTCTGGCGGAGGTGCCTCGCTG  
721.....730.....740.....750.....760.....770.....

Mouse AACTCACTCTGTAGCCCAGGCTGGGCCTCGAACTCAGAATTCGCCTGCCCTCGCCTCCCA-  
Human ATCT-----CCCGACCTCGTGATCCGCCCGCCTCGGCCTCCCAA  
Rat GCGTCAAGATTTGAGGCCCGAGTTACTTTGAGGTT-----GTGAGCAGCTCAA  
chicken TGCTCCAT-----CAGGGTGAAGCTCTGGTT-----GTGTGCA-----  
781.....790.....800.....810.....820.....830.....

Mouse -----T-----TTTT  
Human AGTGCTGGGATTACAGGCGTGAAGCACCAGCGCCCGCCCCCGCCT-----GTAT  
Rat GACTTCGTGAAGAGCAGTATGAGCTTTTATCCTTTGAGCCTTTCTCCACCCCAAGGCAA  
chicken -----CAGCAAGAACGTTAAC--TGAG-----CGAAGGGTG  
841.....850.....860.....870.....880.....890.....

Mouse TTTTTCCTTCAATAGTCAAAAAAAGGTTCAA GCTTTTGCTTCTT-----  
Human AAACCTCTTAAATGG--GAAAAAAGAATCAGGTTTTGGCTGTTTTGTCAGGATATAATAAC  
Rat AATATTTTCAATAGCCAAAAAACAACAAAA-----CAAACAG  
chicken AAT-----GCAGCAAAGGGGACTTACAA-----CAAAGG  
901.....910.....920.....930.....940.....950.....

Mouse -----GGTGCG-----TTTAATCCTCAAGACAGTTCTGCAAGTGAAGGC  
Human TAGCCACCACGTTGTGGTCA-----TTTAATCCTCAAAAAACTT-----AGAGGTA  
Rat GACCTTTTGCTTGGTGGTGGC-----TTTAATCCTGAAGACAGTTCTGCAAGTGTAGGC  
chicken GCACTGACTCGGGGTAGTGTGGCACAGTCTAATTCT--GCCACCTTCTAAGTGAAGAA  
961.....970.....980.....990.....1000.....1010.....

Mouse ATTGTTTTTCTC-CTTTCACGGGGTCTCCAAG-----AGCCAAGGAG  
Human AGCACAATTTCGCTCCTTCGCGGAAACTGGAAG-----ACGTGAAGCA-  
Rat ACAC-----TTTTCACGGGGCTCTAA-----AAGCCAAGGAA  
chicken GCAGCA---GCTTGTGGCTCAGGGCTCTACGTTTCGTTGCCAATCTGATGCCCTCTGGTT  
1021.....1030.....1040.....1050.....1060.....1070.....

Mouse CCTGTACTTTAAAAGCTCTGCAAGGAA-----  
Human -----ATTTGCACAGTCTTGCAGTGAA-----GGGCCAAGCTAGACACT  
Rat CCTGTACT---AAAAGCTCTGCAGCGAACCT-----  
chicken ACTCAGC---AGTAACCCTTCCGCTCACTTGTACCACCGTTAATTTCCAGAAAACCTCAAC  
1081.....1090.....1100.....1110.....1120.....1130.....

Mouse -----CCTTGGACAATAGC-----TTCAGGCTCT  
Human CATACCCAGCCCACCCGCCAGGGCACTAGC-----CCAAGGTCG  
Rat -----TGGACAATAGC-----TTCAGGCTCG  
chicken ATATCATCGATGTATACTATGTACGAGAGGCAACGATACGTATCGTGCGATAACAGGCTCT  
1141.....1150.....1160.....1170.....1180.....1190.....

Mouse GACTTT-----GCAAACAGCTACTAAA-ATACCGGGTTCACCA----CAA  
Human GTCTCTGTGCGCCAACAGTCGCAAGCAGGGACTGAATATCCCCCTTTAGCA----CAA  
Rat GACTCTGCA-----AACAGCAATTAAAAAGCCGGGTTTA-----GCCAAA  
chicken GACGGTGTCTCTGTTAGCCCTAACTTGGACATCAAACCCTGCTGTGGTACCGGCGGGCA  
1201.....1210.....1220.....1230.....1240.....1250.....

Mouse TACCTGCAACTTCCGAGCTTTTGCCCAACCCCA-----AATCCTCAGCGCGCTGCGTCT  
Human ACCAGTAACTTCCGGGAGAT-----CGCCGA-----GACGCTCAGCGCGCTGCGCG  
Rat TACCTGCAACTTCCAAAGTTTCCCCCT--CCCCACTCCGAAACCTCAGCGCGCTGCGTCT  
chicken CAGCCCACTCTCACACACACACCCTTGAAGGCGGAAACCGCGCTGCGCATGCGCC  
1261.....1270.....1280.....1290.....1300.....1310.....

Mouse TCCCATCAG-----GTGACGTCGGCAGCGGGCCCGCG  
Human GCCCT-----TGACGTC AACCAAGCGCTTCTCT  
Rat TCCCACTCAG-----GTGACGTCGGTAGCGGGCTCCCG  
chicken ATCCAACCACTGCGCGCAGCCCCACCCGGGAGGAGGACGGCGCTAGGGGGCGCTGC  
1321.....1330.....1340.....1350.....1360.....1370.....

Mouse C-----  
Human CCCCTTCTGGAA-----  
Rat -----CCACTCTGG  
chicken GCGCGGGCGGAGCCCCGCCCTCCTCCTTCCGCGGGCCCTCAGCCCCGCCCTCCTGG  
1381.....1390.....1400.....1410.....1420.....1430.....

```
Mouse -----T
Human -----CG
Rat   GAACGCGGAGCGG-----GCG-GGCGGCC
chicken CGGCGGGTGGCGGCGCCGCAGCGAGGCGGC
1441.....1450.....1460.....
```

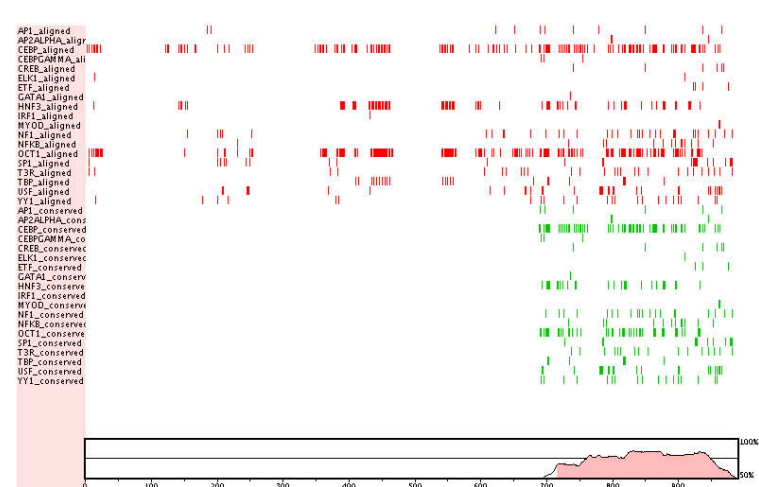

**A. Mouse-rat pair**

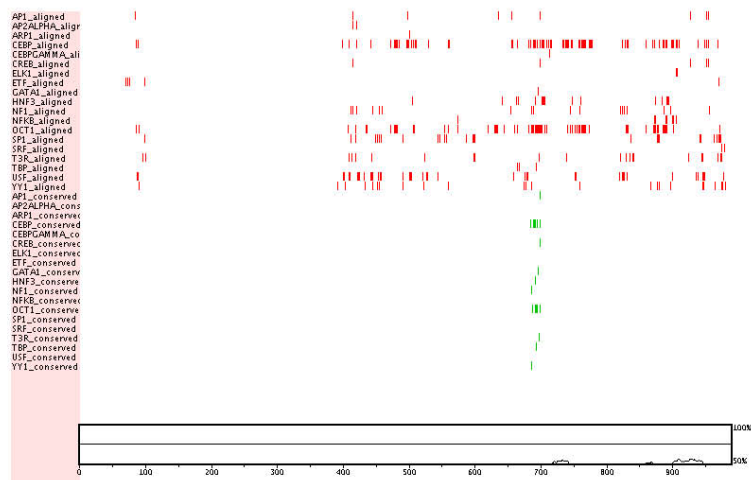

**C. Human-rat pair**

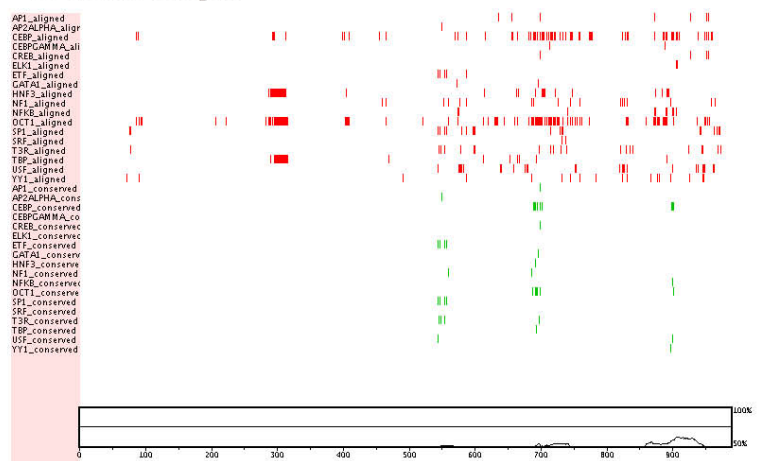

**B. Human-mouse pair**

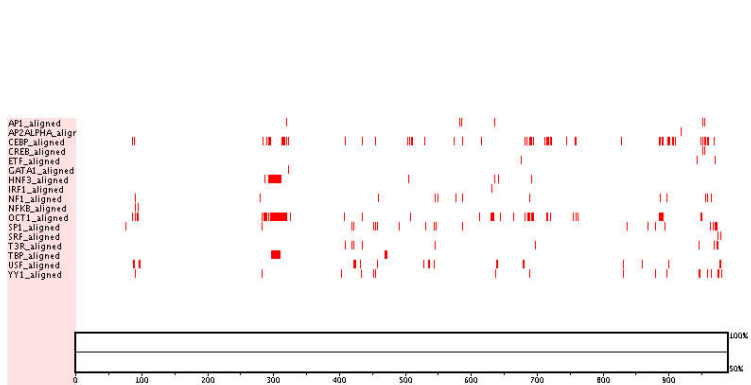

**D. Human-chicken pair**

## Supplementary Figure 6.

Transcription factor binding sites detection in the promoter regions of CPNE1/RBM12 in human, mouse, rat, and chicken.

1,000 bp DNA sequences upstream CPNE1/RBM12 cDNA were used in transcription factor binding sites analysis using rVISTA (<http://genome.lbl.gov/vista/index.shtml>). rVISTA combines searching the major transcription binding site database TRANSFAC from Biobase with a comparative sequence analysis. The program first identifies potential transcription factor binding sites in each of the two aligned sequences, and determines which of the predicted sites are aligned and conserved between the species in the alignment.

X-axis is the nucleotide sequence in the first sequence, with 1000 the nucleotide immediately 5' to the first nucleotide of CPNE1/RBM12 cDNA.

In each figure, the lower panel is the sequence alignment index between the sequence pairs, while the upper panel is the identified transcription factor binding sites, with the red color for aligned TF binding sites and the green color conserved TF binding sites.

**Aligned binding sites:** all the binding sites in the two sequences were identified independently, but only those with core binding site positions corresponded in the alignment of the two sequences were selected as aligned binding sites.

**Conserved binding sites:** predicted binding sites located in the sequence fragments conserved between two species at the level of over 80% over 24 bp window were selected as conserved binding sites.

**Supplementary Fig 7. cDNA sequences that align with human RBM12 cDNA, NM\_006047**  
These cDNA sequences all have very close 5' transcription initiation sites, usually within 40bp of each other. This indicates that the sharing of most 5' exon probably reflects the sharing of the same promoter. (The ones with longer 5' sequences on the display are mostly aligned genomic sequences).

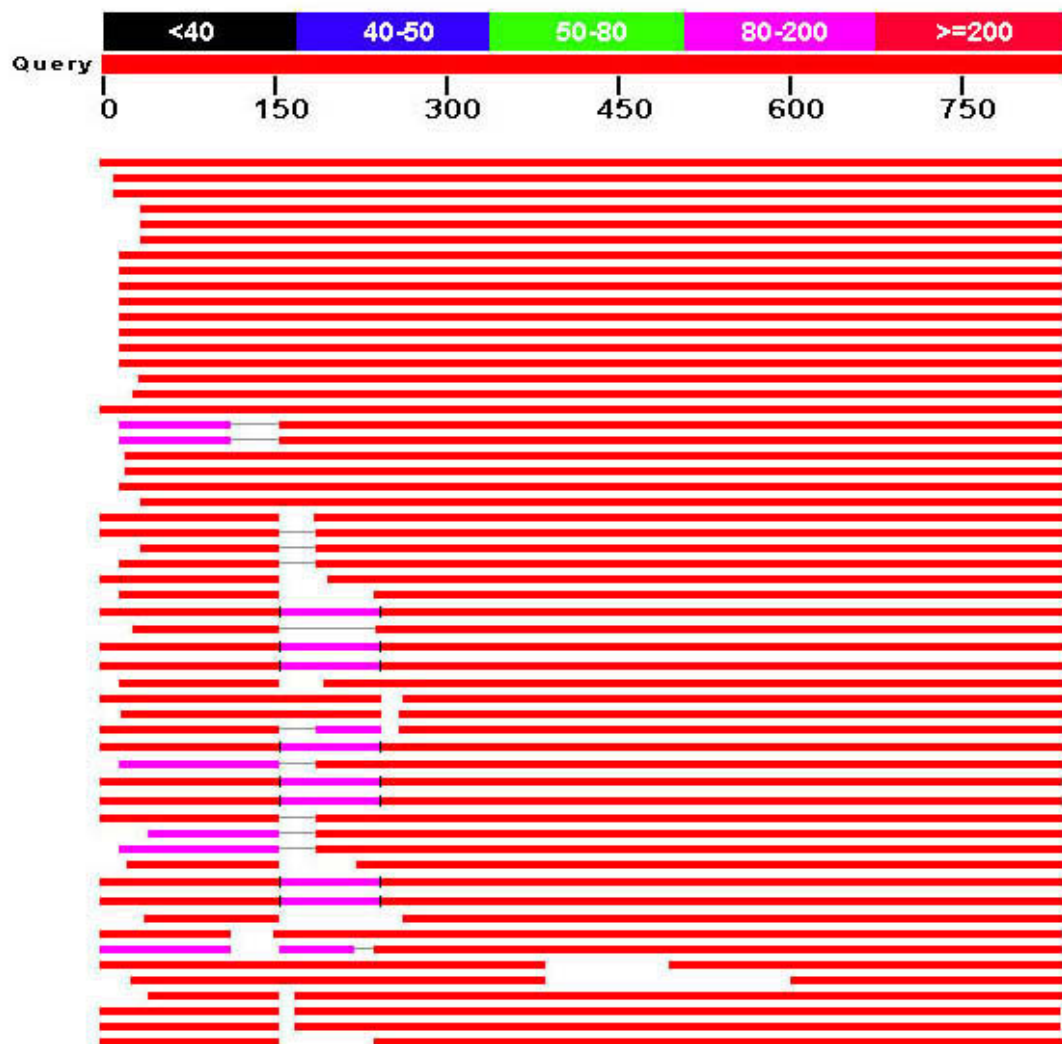

Supplement: 1471-2164-9-456-S1.pdf [file 1471-2164-9-456-S1.pdf]
